# Supplementary material
Source: PubMed Central journal article supplement (PMC2660193)
Supplement: 90629.2008_1.pdf [file 90629.2008_1.pdf]

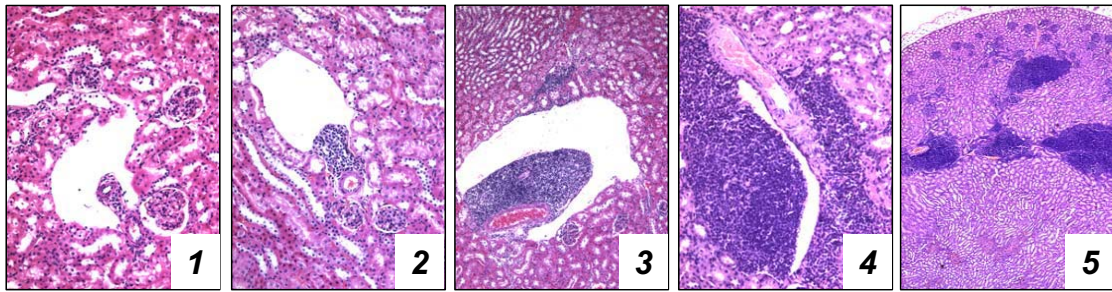

1. No or few lymphocytes noted
2. Small number of diffuse lymphocytes
3. Larger number of diffuse lymphocytes and/or small aggregates
4. Lymphocytes in organized aggregate
5. Multiple lymphocyte aggregates

Supplemental Figure 1.
